# Supplementary material for: Fatigue life predictor: predicting fatigue life of metallic material using LSTM with a contextual attention model
Source: Royal Society of Chemistry journal article supplement (doi:10.1039/d5ra01578b), 2025-01-01
Supplement: d5ra01578b1.xlsx [file d5ra01578b1.xlsx]

## Sheet: Case1_1
Timesteps	Stress	Strain	Fatigue Life
0	-0.00874163	0.00694799	2900
0.002	0.0267906	0.00724378
0.004	0.0643903	0.00756219
0.006	0.103615	0.00790166
0.008	0.143153	0.00825036
0.01	0.183107	0.0086235
0.012	0.222753	0.0089964
0.014	0.261331	0.00937553
0.016	0.298551	0.00974024
0.018	0.334953	0.0101055
0.02	0.369544	0.0104569
0.022	0.401703	0.0107846
0.024	0.430538	0.0110893
0.026	0.455976	0.0113529
0.028	0.476724	0.0115754
0.03	0.493346	0.0117561
0.032	0.505245	0.0118883
0.034	0.512188	0.0119694
0.036	0.514902	0.0119963
0.038	0.514227	0.0120012
0.04	0.509194	0.0119639
0.042	0.497192	0.0118699
0.044	0.478529	0.0117214
0.046	0.455052	0.0115306
0.048	0.426014	0.0112999
0.05	0.393427	0.0110239
0.052	0.357283	0.0107308
0.054	0.318361	0.0104068
0.056	0.278278	0.0100622
0.058	0.236543	0.00969931
0.06	0.195484	0.00933431
0.062	0.154728	0.0089541
0.064	0.11597	0.00858076
0.066	0.079521	0.0082062
0.068	0.0443334	0.00784759
0.07	0.0107865	0.00749447
0.072	-0.0213266	0.00715814
0.074	-0.0506671	0.00686932
0.076	-0.0757649	0.00660429
0.078	-0.0965143	0.00638153
0.08	-0.111891	0.00621647
0.082	-0.122531	0.00609512
0.084	-0.12819	0.00603267
0.086	-0.129573	0.00601223
0.088	-0.12841	0.00601568
0.09	-0.122358	0.00605429
0.092	-0.109981	0.00614992
0.094	-0.0919864	0.00628782
0.096	-0.0685937	0.00646748
0.098	-0.0404558	0.00669339

## Sheet: Case1_2
Timesteps	Stress	Strain	Fatigue Life
0	-0.00134167	0.00697038	4620
0.002	0.035457	0.00726312
0.004	0.0742606	0.0075838
0.006	0.114509	0.00792627
0.008	0.155219	0.00827681
0.01	0.195308	0.00865274
0.012	0.235336	0.00902756
0.014	0.274823	0.00940052
0.016	0.313298	0.00977812
0.018	0.350206	0.0101365
0.02	0.385065	0.0104944
0.022	0.417148	0.0108197
0.024	0.445491	0.0111165
0.026	0.469685	0.0113755
0.028	0.489944	0.0115983
0.03	0.505603	0.0117759
0.032	0.516889	0.0118972
0.034	0.523245	0.0119753
0.036	0.52506	0.0119966
0.038	0.523783	0.0120025
0.04	0.517696	0.0119503
0.042	0.505759	0.0118499
0.044	0.487622	0.0116991
0.046	0.464055	0.0114996
0.048	0.435774	0.0112626
0.05	0.403489	0.0109967
0.052	0.368291	0.010693
0.054	0.330587	0.0103684
0.056	0.2907	0.0100201
0.058	0.250517	0.00965973
0.06	0.20969	0.00928146
0.062	0.170176	0.00890299
0.064	0.130751	0.00853109
0.066	0.0921026	0.00816437
0.068	0.0541106	0.00780607
0.07	0.0180349	0.00745882
0.072	-0.0157726	0.00713311
0.074	-0.0461294	0.00684197
0.076	-0.0726622	0.00657897
0.078	-0.0940842	0.00637509
0.08	-0.110792	0.00620741
0.082	-0.121943	0.00609117
0.084	-0.127766	0.00603046
0.086	-0.12932	0.00600434
0.088	-0.127494	0.00601274
0.09	-0.120518	0.00606306
0.092	-0.107532	0.00615897
0.094	-0.0886489	0.00630217
0.096	-0.0646094	0.00648778
0.098	-0.035156	0.00671026

## Sheet: Case2_1
Timesteps	Stress	Strain	Fatigue Life
0	0.019966	0.00651978	5420
0.002	0.0524082	0.00678956
0.004	0.0872312	0.00709778
0.006	0.121593	0.00740484
0.008	0.156859	0.00772733
0.01	0.195435	0.00808169
0.012	0.234751	0.00841636
0.014	0.273603	0.00875871
0.016	0.311918	0.00910338
0.018	0.348757	0.00943502
0.02	0.384207	0.00975729
0.022	0.416833	0.0100519
0.024	0.446902	0.0103413
0.026	0.472939	0.0105777
0.028	0.494703	0.0108017
0.03	0.512191	0.0109716
0.032	0.525056	0.0110888
0.034	0.533148	0.0111612
0.036	0.536057	0.0112038
0.038	0.535091	0.0112016
0.04	0.529231	0.0111552
0.042	0.517263	0.01106
0.044	0.500168	0.0109231
0.046	0.476684	0.0107228
0.048	0.448352	0.0105043
0.05	0.416609	0.0102513
0.052	0.381405	0.00994822
0.054	0.343852	0.0096412
0.056	0.304887	0.00931209
0.058	0.265153	0.00897067
0.06	0.225132	0.00863129
0.062	0.185681	0.00828658
0.064	0.147773	0.00794747
0.066	0.11289	0.00760933
0.068	0.0786032	0.00727609
0.07	0.0439215	0.0069608
0.072	0.0114963	0.00666227
0.074	-0.0179056	0.00639564
0.076	-0.0436505	0.00615956
0.078	-0.064953	0.00595667
0.08	-0.0810811	0.0058068
0.082	-0.0920985	0.00569156
0.084	-0.0978189	0.00564031
0.086	-0.099203	0.00561764
0.088	-0.097611	0.00562796
0.09	-0.0902416	0.00567862
0.092	-0.0778442	0.00576191
0.094	-0.0601672	0.00589671
0.096	-0.0372702	0.00607284
0.098	-0.0107154	0.00628258

## Sheet: Case2_2
Timesteps	Stress	Strain	Fatigue Life
0	0.035096	0.00600999	5480
0.002	0.0666474	0.00625689
0.004	0.0997618	0.00652213
0.006	0.133442	0.00681527
0.008	0.168116	0.00712609
0.01	0.203889	0.00743694
0.012	0.238751	0.00776567
0.014	0.271935	0.00808682
0.016	0.303145	0.00841812
0.018	0.332401	0.00873119
0.02	0.359734	0.00903397
0.022	0.386608	0.00933249
0.024	0.411188	0.00959798
0.026	0.433505	0.00983514
0.028	0.452611	0.010029
0.03	0.46768	0.0101878
0.032	0.47909	0.0102992
0.034	0.485833	0.010369
0.036	0.488497	0.0104032
0.038	0.488001	0.0103998
0.04	0.483487	0.0103675
0.042	0.473566	0.0102882
0.044	0.457675	0.0101599
0.046	0.437458	0.00999594
0.048	0.413163	0.00979424
0.05	0.384933	0.00956012
0.052	0.353808	0.0093084
0.054	0.320305	0.00902748
0.056	0.28524	0.00873328
0.058	0.249002	0.00842469
0.06	0.212388	0.00811143
0.062	0.175605	0.00779838
0.064	0.139842	0.00747356
0.066	0.105532	0.00716372
0.068	0.0722747	0.00685452
0.07	0.0402649	0.00655408
0.072	0.0133413	0.00626361
0.074	-0.0074	0.00599576
0.076	-0.0254035	0.00574793
0.078	-0.0415786	0.00555127
0.08	-0.055213	0.00539876
0.082	-0.0646015	0.00528797
0.084	-0.0701637	0.00523182
0.086	-0.0718612	0.00520924
0.088	-0.071021	0.00520881
0.09	-0.0665879	0.0052399
0.092	-0.0553659	0.00531141
0.094	-0.0393902	0.00543977
0.096	-0.0185159	0.00559554
0.098	0.0068	0.00578983

## Sheet: Case3_1
Timesteps	Stress	Strain	Fatigue Life
0	0.0104367	0.00649174	5640
0.002	0.0458966	0.00676819
0.004	0.0836946	0.00706867
0.006	0.122271	0.00738937
0.008	0.160457	0.00772977
0.01	0.198621	0.00807713
0.012	0.23761	0.00843168
0.014	0.276145	0.0087731
0.016	0.313827	0.00912154
0.018	0.350645	0.00946446
0.02	0.385564	0.00978612
0.022	0.418006	0.0100924
0.024	0.446538	0.010368
0.026	0.471384	0.0106145
0.028	0.49181	0.0108143
0.03	0.507754	0.0109796
0.032	0.51935	0.0111005
0.034	0.526065	0.0111705
0.036	0.528365	0.0111953
0.038	0.527451	0.011197
0.04	0.521927	0.0111516
0.042	0.511506	0.0110677
0.044	0.494914	0.0109448
0.046	0.473502	0.0107692
0.048	0.447025	0.010555
0.05	0.416928	0.0103125
0.052	0.383736	0.0100323
0.054	0.347549	0.00972964
0.056	0.309596	0.00941413
0.058	0.271033	0.0090793
0.06	0.230704	0.00873364
0.062	0.190319	0.0083871
0.064	0.149923	0.00804193
0.066	0.110327	0.00769643
0.068	0.0717624	0.00735808
0.07	0.035085	0.00702964
0.072	0.00109167	0.00671647
0.074	-0.0287845	0.00644146
0.076	-0.0544761	0.00619143
0.078	-0.0748836	0.00598283
0.08	-0.0908072	0.00581464
0.082	-0.101493	0.00569651
0.084	-0.107597	0.00563617
0.086	-0.109883	0.00560811
0.088	-0.108419	0.00560769
0.09	-0.102435	0.00564917
0.092	-0.0907504	0.0057334
0.094	-0.073267	0.00586336
0.096	-0.0500337	0.00603901
0.098	-0.021929	0.00624887

## Sheet: Case3_2
Timesteps	Stress	Strain	Fatigue Life
0	0.0245978	0.00591459	10060
0.002	0.0527214	0.00615968
0.004	0.0828246	0.00644663
0.006	0.113626	0.00674673
0.008	0.144866	0.00706529
0.01	0.177012	0.00739188
0.012	0.209851	0.0077192
0.014	0.243174	0.00805188
0.016	0.277639	0.00837644
0.018	0.311741	0.00869594
0.02	0.344582	0.00899427
0.022	0.375771	0.00928976
0.024	0.403991	0.00955334
0.026	0.428703	0.00979472
0.028	0.450274	0.00999126
0.03	0.467423	0.0101574
0.032	0.479912	0.010278
0.034	0.488344	0.0103565
0.036	0.492229	0.0103925
0.038	0.492969	0.0104004
0.04	0.491057	0.0103788
0.042	0.484304	0.0103284
0.044	0.472489	0.010241
0.046	0.454091	0.0100974
0.048	0.431208	0.00990672
0.05	0.403641	0.00967939
0.052	0.373306	0.00943134
0.054	0.340447	0.00915287
0.056	0.305718	0.00884857
0.058	0.270143	0.00854034
0.06	0.233658	0.00820882
0.062	0.198056	0.00788292
0.064	0.164344	0.00755839
0.066	0.134782	0.00723293
0.068	0.10648	0.00690559
0.07	0.0790694	0.00659629
0.072	0.051478	0.00629717
0.074	0.024394	0.0060303
0.076	0.0003075	0.00579126
0.078	-0.0202732	0.00559647
0.08	-0.0363889	0.00543233
0.082	-0.0478759	0.00532138
0.084	-0.0552663	0.00525613
0.086	-0.0590723	0.00521606
0.088	-0.0596136	0.00520389
0.09	-0.0576112	0.0052261
0.092	-0.0511	0.00526911
0.094	-0.0392625	0.00535986
0.096	-0.0224746	0.00550668
0.098	-0.000321667	0.00569071

## Sheet: Case4_1
Timesteps	Stress	Strain	Fatigue Life
0	0.058891	0.005546	11120
0.002	0.0836143	0.00577293
0.004	0.11181	0.0060196
0.006	0.142341	0.00628938
0.008	0.173952	0.00656636
0.01	0.207789	0.00685742
0.012	0.241933	0.00713587
0.014	0.275619	0.0074312
0.016	0.309121	0.00771796
0.018	0.341459	0.00799711
0.02	0.373241	0.00827413
0.022	0.403788	0.00853373
0.024	0.431943	0.00878489
0.026	0.457068	0.00900178
0.028	0.478712	0.00919209
0.03	0.496341	0.00935209
0.032	0.509278	0.00947124
0.034	0.517886	0.00955036
0.036	0.522492	0.0095852
0.038	0.522516	0.00959956
0.04	0.518521	0.0095688
0.042	0.509773	0.00950293
0.044	0.495966	0.00939573
0.046	0.47676	0.00924556
0.048	0.452948	0.00905369
0.05	0.425141	0.00883031
0.052	0.394783	0.00858676
0.054	0.361995	0.0083232
0.056	0.32842	0.0080488
0.058	0.293456	0.00775751
0.06	0.258416	0.00746689
0.062	0.223514	0.00716027
0.064	0.189148	0.00686911
0.066	0.156463	0.00658573
0.068	0.124799	0.00629813
0.07	0.0953015	0.00603729
0.072	0.0681285	0.00577924
0.074	0.0448897	0.00553156
0.076	0.0230106	0.005312
0.078	0.00289917	0.00513551
0.08	-0.0123448	0.00498876
0.082	-0.0226481	0.00490316
0.084	-0.029214	0.00483729
0.086	-0.0315754	0.00481298
0.088	-0.030937	0.00481733
0.09	-0.0262556	0.00485031
0.092	-0.0168773	0.00492289
0.094	-0.0031	0.00502396
0.096	0.0149732	0.00516849
0.098	0.0366749	0.00534187

## Sheet: Case4_2
Timesteps	Stress	Strain	Fatigue Life
0	0.0834989	0.00502666	14840
0.002	0.108351	0.00522854
0.004	0.135102	0.00545507
0.006	0.16365	0.00569724
0.008	0.192881	0.00595451
0.01	0.223102	0.00622252
0.012	0.252962	0.00649229
0.014	0.282643	0.00676187
0.016	0.311737	0.00703298
0.018	0.3404	0.00729042
0.02	0.368225	0.00755319
0.022	0.394644	0.00780112
0.024	0.419446	0.00804041
0.026	0.442025	0.00824232
0.028	0.461075	0.00842586
0.03	0.476515	0.0085643
0.032	0.488035	0.00867489
0.034	0.495703	0.00874483
0.036	0.499677	0.0087838
0.038	0.500024	0.00879321
0.04	0.497997	0.00878334
0.042	0.490935	0.00872892
0.044	0.479611	0.0086456
0.046	0.463767	0.00850679
0.048	0.443288	0.00835383
0.05	0.419609	0.0081668
0.052	0.393356	0.00795142
0.054	0.36464	0.0077203
0.056	0.334752	0.00746598
0.058	0.303764	0.00720913
0.06	0.272982	0.00693614
0.062	0.242167	0.00666518
0.064	0.212252	0.00639334
0.066	0.183161	0.00612603
0.068	0.154738	0.00585304
0.07	0.127263	0.00560042
0.072	0.101913	0.0053504
0.074	0.0780618	0.00512322
0.076	0.0572299	0.00492032
0.078	0.0394321	0.00474802
0.08	0.0254188	0.00460738
0.082	0.0153857	0.00451041
0.084	0.00900442	0.00444727
0.086	0.00598333	0.00441262
0.088	0.00585833	0.00440124
0.09	0.00774167	0.00442404
0.092	0.0147242	0.00447218
0.094	0.0255323	0.00455957
0.096	0.0409562	0.00468368
0.098	0.0602083	0.00483877

## Sheet: Case5_1
Timesteps	Stress	Strain	Fatigue Life
0	0.103752	0.00461227	15640
0.002	0.126931	0.00479231
0.004	0.151543	0.00500796
0.006	0.178068	0.0052232
0.008	0.205718	0.00544756
0.01	0.234167	0.00568471
0.012	0.26336	0.00592862
0.014	0.292147	0.00615871
0.016	0.320722	0.00639062
0.018	0.348471	0.0066352
0.02	0.375779	0.00685284
0.022	0.402347	0.00707547
0.024	0.427165	0.00728831
0.026	0.450009	0.0074772
0.028	0.469583	0.00763813
0.03	0.485552	0.00778471
0.032	0.497878	0.00787804
0.034	0.505729	0.00796489
0.036	0.510042	0.00799591
0.038	0.510321	0.00799844
0.04	0.507084	0.00797431
0.042	0.499558	0.0079148
0.044	0.487469	0.00783236
0.046	0.471801	0.00770356
0.048	0.451609	0.00754093
0.05	0.42817	0.00734969
0.052	0.402381	0.00715316
0.054	0.374359	0.00692787
0.056	0.34566	0.00669991
0.058	0.315901	0.00645182
0.06	0.286026	0.0062068
0.062	0.256308	0.00597284
0.064	0.226833	0.00571529
0.066	0.198188	0.00548378
0.068	0.170062	0.00524858
0.07	0.143116	0.00502124
0.072	0.118442	0.00480444
0.074	0.095661	0.00460413
0.076	0.0758535	0.00443444
0.078	0.058863	0.00428849
0.08	0.0451823	0.00417102
0.082	0.0355708	0.00408138
0.084	0.0293556	0.00403596
0.086	0.0266173	0.00401649
0.088	0.0269142	0.00400111
0.09	0.030072	0.00402929
0.092	0.0381607	0.00409524
0.094	0.0497778	0.00418324
0.096	0.0651165	0.00429822
0.098	0.0834271	0.00444591

## Sheet: Case5_2
Timesteps	Stress	Strain	Fatigue Life
0	0.0529108	0.00558831	17140
0.002	0.0772302	0.00581658
0.004	0.103861	0.00605911
0.006	0.132365	0.00631933
0.008	0.162013	0.00660729
0.01	0.192447	0.00688418
0.012	0.223113	0.00717738
0.014	0.253964	0.00746671
0.016	0.283996	0.00775813
0.018	0.313528	0.00802907
0.02	0.343051	0.00831013
0.022	0.371163	0.008574
0.024	0.397215	0.00881973
0.026	0.420643	0.00903591
0.028	0.440394	0.00921631
0.03	0.456826	0.00937973
0.032	0.468887	0.00948924
0.034	0.476547	0.00956582
0.036	0.479901	0.00959564
0.038	0.479817	0.00959671
0.04	0.476504	0.0095712
0.042	0.467302	0.00949929
0.044	0.453517	0.00939498
0.046	0.435054	0.00923493
0.048	0.412312	0.00903938
0.05	0.386098	0.00881067
0.052	0.357156	0.00857653
0.054	0.326904	0.00830542
0.056	0.295305	0.00803684
0.058	0.262766	0.00773827
0.06	0.229888	0.00744627
0.062	0.198025	0.0071532
0.064	0.166705	0.00685911
0.066	0.137141	0.00658427
0.068	0.10862	0.00629938
0.07	0.0815769	0.00601831
0.072	0.0565338	0.00576733
0.074	0.034461	0.00553009
0.076	0.0170057	0.00530796
0.078	0.0047	0.00513889
0.08	-0.006625	0.00499324
0.082	-0.0149557	0.00489516
0.084	-0.0198265	0.00484382
0.086	-0.021554	0.0048188
0.088	-0.021236	0.00482044
0.09	-0.0167658	0.00484742
0.092	-0.007725	0.00492409
0.094	0.00461667	0.00504551
0.096	0.017148	0.00519387
0.098	0.0318106	0.00537884

[truncated: 10 more sheets: Case6_1, Case6_2, Case7_1, Case7_2, Case8_1, Case8_2, Case9_1, Case9_2, Case10_1, Case10_2]
